# Supplementary material for: The Effects of Breed and Residual Feed Intake Divergence on the Abundance and Active Population of Rumen Microbiota in Beef Cattle
Source: MDPI journal article supplement (doi:10.3390/ani12151966), 2022-08-03
Supplement: s1 [file s1]

**Table S1.** Production performance of various breeds of beef steers with divergent RFI

| Item     |                | Angus       | Charolais   | Kinsella Composite |
|----------|----------------|-------------|-------------|--------------------|
| RFI kg/d | High-RFI       | 1.10±0.10   | 0.96±0.08   | 1.04±0.14          |
|          | Low-RFI        | -0.66±0.10  | -0.89±0.08  | -0.98±0.14         |
|          | <i>P</i> value | **          | **          | **                 |
| DMI kg/d | High-RFI       | 12.09±0.73a | 11.63±0.45a | 11.07±0.81a        |
|          | Low-RFI        | 10.87±0.73b | 9.89±0.45b  | 9.33±0.80b         |
|          | <i>P</i> value | **          | **          | **                 |
| ADG kg/d | High-RFI       | 1.59±0.07   | 1.60±0.06   | 1.46±0.06          |
|          | Low-RFI        | 1.85±0.07   | 1.67±0.06   | 1.61±0.06          |
|          | <i>P</i> value | **          | n.s.        | *                  |
| FCR      | High-RFI       | 7.88±0.51   | 7.34±0.19   | 7.57±0.35          |
|          | Low-RFI        | 5.90±0.51   | 5.99±0.19   | 5.89±0.34          |
|          | <i>P</i> value | **          | **          | **                 |

Notes: n.s. not significant; \*  $P<0.05$ ; \*\*  $P<0.01$ ; RFI: Residual feed intake; DMI: Dry matter intake; ADG: Average daily gain; FCR: Feed conversion ratio.
